# Supplementary material for: QTL detection by multi-parent linkage mapping in oil palm (Elaeis guineensis Jacq.)
Source: PubMed Central journal article supplement — Theor Appl Genet. 2010 Feb 25;120(8):1673–87. doi: 10.1007/s00122-010-1284-y (PMC2859221; doi:10.1007/s00122-010-1284-y), 2010-02-25
Supplement: 122_2010_1284_MOESM1_ESM.pdf [file 122_2010_1284_MOESM1_ESM.pdf]

QTL detection by multi-parent linkage mapping in oil palm (*Elaeis guineensis* Jacq.), Theoretical and Applied Genetics, Billotte N, CIRAD (Centre de coopération Internationale en Recherche Agronomique pour le Développement), UMR 1098 Plant Development and Molecular Improvement, Avenue Agropolis, TA A03/96, 34398 Montpellier Cedex 5, France, email: billotte@cirad.fr

Online Resource 1 Positions and effects of the QTL identified by the within-family or across-family analyses. at the risk genome-wide threshold  $\alpha$  of 4% per cross

A. QTL identified by the within-family analyses

| Trait                                             | QTL<br>code <sup>a</sup> | Within family analyses            |                  |                               |            |       |                         |                       |                                 |      |                     |  |
|---------------------------------------------------|--------------------------|-----------------------------------|------------------|-------------------------------|------------|-------|-------------------------|-----------------------|---------------------------------|------|---------------------|--|
|                                                   |                          | Estimation<br>system <sup>a</sup> | Linkage<br>group | Position <sup>b</sup><br>(cM) | Confidence |       | F <sup>c</sup><br>value | R <sup>2</sup><br>(%) | Estimated effects               |      |                     |  |
|                                                   |                          |                                   |                  |                               | intervalle |       |                         |                       | Genetic background <sup>d</sup> |      | Parent <sup>e</sup> |  |
|                                                   |                          |                                   |                  |                               | from       | to    |                         |                       | Africa x Deli                   | Deli | Africa              |  |
| Average bunch number/palm/year at 3-5 years (kg): | Bn3_5_4C                 | 4                                 | 1                | 71.4                          | 69.5       | 76.6  | 9.2                     | 24.5                  | 21.2                            | 3.0  | 5.0                 |  |
|                                                   | Bn3_5_1C                 | 1                                 | 4                | 207.9                         | 188.3      | 218.2 | 9.3                     | 14.7                  | 30.0                            | -1.5 | 0.6                 |  |
|                                                   | Bn3_5_3-                 | 3                                 | 15               | 10.9                          | 0.0        | 23.0  | 11.5                    | 28.7                  | 24.0                            | -3.0 | 1.8                 |  |
| Average bunch weight at 3-5 years (kg):           | Bwt3_5_3-                | 3                                 | 4                | 197.0                         | 195.0      | 209.1 | 10.5                    | 28.0                  | 6.2                             | 0.5  | 0.0                 |  |
|                                                   | Bwt3_5_3-                | 3                                 | 7                | 90.8                          | 82.1       | 111.3 | 15.1                    | 35.9                  | 6.2                             | 0.5  | 0.5                 |  |
|                                                   | Bwt3_5_4C                | 4                                 | 8                | 126.1                         | 111.3      | 152.5 | 8.8                     | 25.0                  | 8.2                             | 0.9  | 1.1                 |  |
|                                                   | Bwt3_5_2C                | 2                                 | 16               | 39.8                          | 30.1       | 48.9  | 8.5                     | 22.8                  | 5.6                             | 0.0  | 0.3                 |  |
| Fresh Fruit Bunch yield/palm/year at 3-5 years:   | FFB3_5_3-                | 3                                 | 15               | 5.9                           | 0.0        | 18.1  | 10.5                    | 27.0                  | 146.9                           | 14.0 | 3.4                 |  |
|                                                   | FFB3_5_2-                | 2                                 | 16               | 34.8                          | 12.4       | 44.2  | 8.8                     | 23.3                  | 155.9                           | 1.1  | 9.3                 |  |

|                                                      |           |   |    |       |       |       |      |      |        |      |       |
|------------------------------------------------------|-----------|---|----|-------|-------|-------|------|------|--------|------|-------|
| Palm oil yield/palm/year at 3-5 years (ton/ha/year): | PO3_5_2C  | 2 | 16 | 39.8  | 31.6  | 48.1  | 11.4 | 31.0 | 5.3    | 2.2  | 0.2   |
| Average bunch number/palm/year at 6-9 years (kg):    | Bn6_9_3-  | 3 | 12 | 22.7  | 17.1  | 50.6  | 11.9 | 30.2 | 13.9   | 0.8  | 1.9   |
| Average bunch weight at 6-9 years (kg):              | Bwt6_9_3- | 3 | 12 | 26.9  | 0.0   | 50.2  | 9.0  | 24.3 | 17.5   | 0.0  | 1.6   |
| Fresh Fruit Bunch yield/palm/year at 3-5 years:      | FFB6_9_3- | 3 | 4  | 70.3  | 61.7  | 100.3 | 12.0 | 31.2 | 235.6  | 14.9 | 10.4  |
|                                                      | FFB6_9_3- | 3 | 12 | 66.9  | 49.4  | 82.2  | 10.2 | 27.7 | 13.9   | 0.8  | 1.9   |
| Palm oil yield/palm/year at 6-9 years (ton/ha/year): | PO6_9_3-  | 3 | 9  | 68.0  | 54.5  | 74.1  | 17.4 | 40.5 | 8.1    | 0.6  | 0.8   |
|                                                      | PO6_9_3-  | 3 | 16 | 14.3  | 1.7   | 24.9  | 10.2 | 28.5 | 8.1    | 0.2  | 0.6   |
| Average weight of the analysed bunch (kg):           | aBwt_1-   | 1 | 1  | 118.6 | 114.9 | 125.6 | 10.3 | 18.2 | 14.6   | 0.1  | 0.7   |
|                                                      | aBwt_3-   | 3 | 4  | 152.3 | 142.6 | 161.8 | 12.7 | 33.2 | 27.0   | 7.0  | 1.8   |
|                                                      | aBwt_1-   | 1 | 4  | 233.3 | 214.4 | 236.5 | 9.2  | 16.7 | 14.6   | 0.5  | 0.5   |
|                                                      | aBwt_1-   | 1 | 10 | 17.7  | 7.3   | 23.6  | 10.4 | 18.5 | 14.6   | 0.3  | 0.8   |
|                                                      | aBwt_1-   | 1 | 12 | 168.3 | 124.8 | 176.5 | 8.8  | 16.1 | 14.6   | 0.4  | 0.5   |
| Average number of fruits per bunch:                  | Fn_3C     | 3 | 6  | 106.0 | 99.2  | 111.4 | 8.9  | 25.1 | 1975.8 | 15.7 | 247.6 |
| Average weight of the fruit (g):                     | Fwt_1C    | 1 | 3  | 13.4  | 6.1   | 28.0  | 8.8  | 16.0 | 7.6    | 0.1  | 0.4   |
|                                                      | Fwt_1C    | 1 | 7  | 99.0  | 81.8  | 119.8 | 9.6  | 17.3 | 7.6    | 0.0  | 0.4   |
|                                                      | Fwt_1-    | 1 | 8  | 133.4 | 125.8 | 137.1 | 11.2 | 19.5 | 7.6    | 0.1  | 0.4   |
|                                                      | Fwt_1-    | 1 | 12 | 168.1 | 150.1 | 175.7 | 9.1  | 16.5 | 7.6    | 0.1  | 0.3   |
|                                                      | Fwt_2C    | 2 | 16 | 34.8  | 28.4  | 45.1  | 16.1 | 37.8 | 7.3    | 0.7  | 0.4   |
| Pulp to fruit ratio (%):                             | %PF_1-    | 1 | 1  | 145.8 | 136.0 | 152.8 | 12.4 | 21.2 | 78.1   | 0.0  | 1.3   |
|                                                      | %PF_1-    | 1 | 10 | 36.1  | 0.0   | 44.5  | 9.2  | 16.6 | 78.1   | 0.3  | 1.0   |

|                                          |           |   |    |       |       |       |      |      |       |      |      |
|------------------------------------------|-----------|---|----|-------|-------|-------|------|------|-------|------|------|
|                                          | %PF_1-    | 1 | 12 | 81.9  | 40.2  | 91.1  | 10.2 | 18.1 | 78.1  | 0.1  | 1.1  |
|                                          | %PF_1-    | 1 | 15 | 29.3  | 13.4  | 54.4  | 9.7  | 17.4 | 78.1  | 0.9  | 0.6  |
|                                          | %PF_1C    | 1 | 16 | 0.0   | 0.0   | 8.3   | 10.8 | 19.1 | 78.1  | 0.7  | 0.9  |
| Palm oil to pulp ratio (%):              | %POP_1C   | 1 | 1  | 136.3 | 131.0 | 141.8 | 25.2 | 33.5 | 54.5  | 0.1  | 0.7  |
| Palm oil industrial extraction rate (%): | IER_1C    | 1 | 1  | 136.3 | 129.0 | 143.4 | 19.2 | 27.7 | 23.1  | 0.1  | 1.5  |
|                                          | IER_3C    | 3 | 4  | 207.9 | 172.2 | 220.1 | 10.0 | 27.3 | 26.0  | 0.8  | 0.4  |
| Iodine value:                            | I_1-      | 1 | 1  | 83.5  | 74.4  | 91.2  | 10.4 | 19.3 | 55.5  | 0.2  | 0.7  |
|                                          | I_1C      | 1 | 15 | 29.3  | 27.8  | 30.1  | 20.2 | 31.7 | 56.0  | 0.8  | 0.8  |
| %KF                                      | %KF_1-    | 1 | 1  | 145.8 | 135.5 | 153.2 | 12.7 | 20.6 | 9.3   | 0.5  | 0.5  |
|                                          | %KF_1C    | 1 | 16 | 2.7   | 0.0   | 7.4   | 12.7 | 20.5 | 9.4   | 0.1  | 0.6  |
| Stem height (m):                         | Ht_1C     | 1 | 4  | 157.3 | 141.1 | 181.5 | 10.6 | 17.9 | 654.5 | 14.4 | 35.3 |
|                                          | Ht_1C     | 1 | 8  | 64.3  | 54.9  | 67.3  | 21.3 | 30.3 | 654.5 | 6.5  | 34.4 |
|                                          | Ht_2C     | 2 | 11 | 45.0  | 0.0   | 86.7  | 11.9 | 31.0 | 652.5 | 1.8  | 56.7 |
|                                          | Ht_3C     | 3 | 15 | 69.0  | 59.6  | 74.6  | 10.9 | 29.2 | 673.8 | 14.8 | 28.3 |
| Average number of leaves per crown:      | Leaf_n_3- | 3 | 4  | 197.0 | 194.7 | 208.8 | 11.3 | 29.9 | 36.0  | 2.7  | 1.5  |
|                                          | Leaf_n_4C | 4 | 13 | 33.0  | 19.0  | 104.3 | 14.2 | 34.4 | 37.8  | 2.2  | 3.1  |
| Average length of the leaf L17 (cm):     | L17_L_1C  | 1 | 4  | 94.2  | 79.7  | 111.1 | 12.2 | 20.5 | 638.6 | 15.1 | 11.6 |
|                                          | L17_L_3C  | 3 | 4  | 221.8 | 212.6 | 228.6 | 12.6 | 32.3 | 643.6 | 2.0  | 21.7 |
|                                          | L17_L_1-  | 1 | 5  | 55.9  | 33.6  | 64.3  | 8.6  | 15.3 | 636.1 | 4.2  | 10.6 |

|                                                 |          |   |    |       |       |       |      |      |       |      |      |
|-------------------------------------------------|----------|---|----|-------|-------|-------|------|------|-------|------|------|
|                                                 | L17_L_1C | 1 | 10 | 139.2 | 125.2 | 143.7 | 11.0 | 18.8 | 638.6 | 11.4 | 11.3 |
| Petiole average width of the leaf L17 (cm):     | P_W_134C | 1 | 3  | 59.5  | 49.0  | 63.3  | 8.2  | 12.7 | 9.1   | 0.2  | 0.2  |
|                                                 | P_W_134C | 3 | 3  | 59.5  | 54.3  | 67.3  | 11.4 | 30.5 | 10.4  | 0.4  | 0.0  |
|                                                 | P_W_134C | 4 | 3  | 57.3  | 56.2  | 58.5  | 12.8 | 32.5 | 10.1  | 0.1  | 1.0  |
|                                                 | P_W_1-   | 1 | 5  | 55.9  | 41.0  | 64.3  | 15.8 | 25.1 | 9.1   | 0.2  | 0.2  |
|                                                 | P_W_1-   | 1 | 15 | 83.6  | 81.3  | 85.1  | 9.4  | 16.6 | 9.1   | 0.0  | 0.2  |
| Petiole average thickness of the leaf L17 (cm): | P_T_3-   | 3 | 13 | 72.8  | 55.1  | 91.5  | 13.5 | 33.7 | 4.8   | 0.1  | 0.2  |
| Average number of leaflets per leaf L17:        | Lt_n_4C  | 4 | 4  | 175.7 | 17.9  | 188.6 | 13.0 | 32.5 | 170.1 | 7.0  | 0.5  |
|                                                 | Lt_n_1C  | 1 | 4  | 230.5 | 224.3 | 234.0 | 12.9 | 20.5 | 170.8 | 4.1  | 2.9  |
|                                                 | Lt_n_2-  | 2 | 8  | 83.6  | 66.4  | 119.0 | 8.9  | 25.2 | 174.1 | 10.7 | 1.8  |
|                                                 | Lt_n_2-  | 2 | 10 | 34.5  | 0.0   | 42.7  | 11.9 | 31.0 | 174.1 | 4.8  | 0.1  |
| Leaflet average length of the leaf L17 (cm):    | Lt_L_3C  | 3 | 10 | 64.6  | 55.8  | 77.0  | 10.0 | 27.4 | 114.1 | 3.3  | 0.0  |
| Leaflet average width of the leaf L17 (cm):     | Lt_W_2-  | 2 | 4  | 202.7 | 196.1 | 210.2 | 10.3 | 27.9 | 7.1   | 0.8  | 0.1  |
|                                                 | Lt_W_2C  | 2 | 8  | 189.0 | 184.6 | 189.0 | 9.7  | 26.8 | 7.1   | 0.3  | 0.1  |

Note : <sup>a</sup>: QTL\_i-: QTL detected by the within-family analysis on the single cross i with 1 = LM2T x DA10D; 2 = LM2T x LM269D; 3 = LM718T x DA10D; 4 = LM718T x LM269D. QTL\_i**C**: QTL also detected by the across-family analysis on the multiple cross design **C**. <sup>b</sup>: From the first marker of the group. <sup>c</sup>: Significant F threshold of 8.6 (LOD of 3.7). <sup>d</sup>: Compared to the general mean of the cross. <sup>e</sup>: Additive substitution allelic effect (two allele of opposite effects by model).

B. QTL identified by the across-family analysis

| Trait  | QTL<br>code <sup>f</sup> | Across family analysis            |                  |                               |                          |                         |                       |                                                 |       |       |       |                          |        |                            |        |      |
|--------|--------------------------|-----------------------------------|------------------|-------------------------------|--------------------------|-------------------------|-----------------------|-------------------------------------------------|-------|-------|-------|--------------------------|--------|----------------------------|--------|------|
|        |                          | Estimation<br>system <sup>f</sup> | Linkage<br>group | Position <sup>g</sup><br>(cM) | Confidence<br>Intervalle | F <sup>h</sup><br>value | R <sup>2</sup><br>(%) | Estimated effects                               |       |       |       |                          |        |                            |        |      |
|        |                          |                                   |                  | from                          |                          | to                      |                       | Genetic background<br>of the cross <sup>i</sup> |       |       |       | Parent Deli <sup>j</sup> |        | Parent Africa <sup>j</sup> |        |      |
|        |                          |                                   |                  |                               |                          |                         |                       | 1                                               | 2     | 3     | 4     | DA10D                    | LM269D | LM2T                       | LM718T |      |
| Bn3_5  | Bn3_5_4C                 | C                                 | 1                | 76.3                          | 69.8                     | 79.6                    | 8.2                   | 10.5                                            | 29.7  | 29.3  | 24.5  | 21.7                     | 1.0    | 1.6                        | 0.5    | 2.2  |
|        | Bn3_5_1C                 | C                                 | 4                | 207.9                         | 204.1                    | 219.9                   | 5.1                   | 6.8                                             | 29.7  | 29.3  | 24.5  | 21.7                     | 1.7    | 0.4                        | 0.2    | 0.4  |
| Bwt3_5 | Bwt3_5_-C                | C                                 | 1                | 78.5                          | 70.9                     | 84.5                    | 5.0                   | 6.8                                             | 4.6   | 5.6   | 6.2   | 8.0                      | 0.2    | 0.1                        | 0.1    | 0.4  |
|        | Bwt3_5_4C                | C                                 | 8                | 138.4                         | 129.9                    | 163.6                   | 6.2                   | 8.2                                             | 4.6   | 5.6   | 6.2   | 8.1                      | 0.2    | 0.1                        | 0.1    | 0.5  |
| FFB3_5 | FFB3_5_-C                | C                                 | 1                | 71.4                          | 56.7                     | 86.1                    | 6.9                   | 9.1                                             | 136.3 | 156.3 | 148.7 | 148.5                    | 6.9    | 11.3                       | 3.5    | 12.4 |
| PO3_5  | PO3_5_-C                 | C                                 | 1                | 71.4                          | 58.8                     | 75.7                    | 6.0                   | 8.6                                             | 4.3   | 5.4   | 5.0   | 5.6                      | 0.5    | 0.5                        | 0.0    | 0.4  |
|        | PO3_5_2C                 | C                                 | 16               | 34.8                          | 12.0                     | 38.0                    | 4.7                   | 6.9                                             | 4.3   | 5.4   | 5.0   | 5.6                      | 0.2    | 0.1                        | 0.2    | 0.4  |
| Bn6_9  | Bn6_9_-C                 | C                                 | 15               | 75.7                          | 69.1                     | 88.8                    | 7.3                   | 9.2                                             | 21.7  | 16.3  | 14.1  | 9.2                      | 0.9    | 0.3                        | 0.6    | 0.9  |
| Bwt6_9 | Bwt6_9_-C                | C                                 | 1                | 78.5                          | 76.9                     | 79.9                    | 11.0                  | 14.4                                            | 11.2  | 14.5  | 17.7  | 23.1                     | 0.4    | 0.4                        | 0.2    | 1.0  |
|        | Bwt6_9_-C                | C                                 | 2                | 63.2                          | 45.8                     | 83.0                    | 4.5                   | 6.4                                             | 11.2  | 14.5  | 17.7  | 23.1                     | 0.3    | 0.7                        | 0.3    | 0.8  |
|        | Bwt6_9_-C                | C                                 | 6                | 93.6                          | 73.8                     | 97.5                    | 9.6                   | 12.7                                            | 11.2  | 14.5  | 17.7  | 23.1                     | 0.0    | 0.4                        | 0.1    | 1.3  |

|        |           |   |    |       |       |       |      |      |        |        |        |        |      |      |      |       |
|--------|-----------|---|----|-------|-------|-------|------|------|--------|--------|--------|--------|------|------|------|-------|
|        | Bwt6_9_-C | C | 16 | 14.3  | 6.9   | 32.2  | 5.6  | 7.8  | 11.2   | 14.5   | 17.7   | 23.1   | 0.3  | 0.2  | 0.4  | 1.0   |
| FFB6_9 | FFB6_9_-C | C | 1  | 88.5  | 58.5  | 102.2 | 5.4  | 7.1  | 235.4  | 222.0  | 232.1  | 198.9  | 7.1  | 1.2  | 7.3  | 11.5  |
| Fn     | Fn_3C     | C | 6  | 102.8 | 82.2  | 110.2 | 5.9  | 8.2  | 1276.9 | 1765.6 | 1958.1 | 2369.9 | 1.3  | 63.0 | 99.5 | 157.4 |
| Fwt    | Fwt_-C    | C | 1  | 129.6 | 123.2 | 141.6 | 7.8  | 11.0 | 7.5    | 7.2    | 9.1    | 9.0    | 0.5  | 0.4  | 0.1  | 0.2   |
|        | Fwt_1C    | C | 3  | 0.0   | 0.0   | 7.8   | 5.0  | 7.2  | 7.5    | 7.2    | 9.2    | 9.1    | 0.1  | 0.1  | 0.3  | 0.3   |
|        | Fwt_1C    | C | 7  | 33.0  | 26.7  | 53.6  | 4.5  | 6.6  | 7.5    | 7.2    | 9.2    | 9.1    | 0.0  | 0.0  | 0.4  | 0.0   |
|        | Fwt_2C    | C | 16 | 39.8  | 27.9  | 55.1  | 5.4  | 7.8  | 7.5    | 7.2    | 9.1    | 9.0    | 0.3  | 0.5  | 0.1  | 0.4   |
| %PF    | %PF_1C    | C | 16 | 7.7   | 0.0   | 13.1  | 5.9  | 8.2  | 77.8   | 80.5   | 80.9   | 82.3   | 0.6  | 0.4  | 1.1  | 0.7   |
| %POP   | %POP_1C   | C | 1  | 136.3 | 130.4 | 143.2 | 12.5 | 16.2 | 54.5   | 55.7   | 55.0   | 55.2   | 0.3  | 0.8  | 1.6  | 1.1   |
| IER    | IER_1C    | C | 1  | 136.3 | 130.0 | 144.4 | 9.1  | 12.6 | 23.2   | 25.3   | 25.8   | 26.9   | 0.0  | 0.1  | 1.1  | 0.9   |
|        | IER_3C    | C | 4  | 207.1 | 194.6 | 217.7 | 5.7  | 8.2  | 23.2   | 25.3   | 25.8   | 26.9   | 0.8  | 0.7  | 0.0  | 0.3   |
| I      | I_-C      | C | 13 | 50.7  | 41.1  | 60.8  | 5.4  | 9.2  | 55.7   | 55.7   | 53.4   | 52.5   | 0.2  | 0.5  | 0.5  | 0.6   |
|        | I_1C      | C | 15 | 29.2  | 28.2  | 32.4  | 17.0 | 24.2 | 55.7   | 55.7   | 53.4   | 52.5   | 0.5  | 0.8  | 0.7  | 1.2   |
| %KF    | %KF_1C    | C | 16 | 7.7   | 0.0   | 10.7  | 6.9  | 9.7  | 9.3    | 8.3    | 8.9    | 9.2    | 0.3  | 0.5  | 0.6  | 0.4   |
| Ht     | Ht_1C     | C | 4  | 165.6 | 152.1 | 197.6 | 6.3  | 9.0  | 647.9  | 645.8  | 674.3  | 706.0  | 3.4  | 0.2  | 32.3 | 0.0   |
|        | Ht_1C     | C | 8  | 71.3  | 62.6  | 77.0  | 9.0  | 12.5 | 647.9  | 645.8  | 674.3  | 706.0  | 3.1  | 54.0 | 26.6 | 0.7   |
|        | Ht_2C     | C | 11 | 131.6 | 92.6  | 140.9 | 9.6  | 13.1 | 647.9  | 645.8  | 674.3  | 706.0  | 3.4  | 0.2  | 32.3 | 0.0   |
|        | Ht_3C     | C | 15 | 64.4  | 56.9  | 78.6  | 9.4  | 12.8 | 647.9  | 645.8  | 674.3  | 706.0  | 10.2 | 50.6 | 2.5  | 23.3  |
| Leaf_n | Leaf_n_4C | C | 13 | 51.2  | 41.9  | 102.2 | 8.8  | 11.7 | 34.3   | 32.6   | 36.0   | 37.7   | 0.1  | 2.6  | 0.2  | 2.6   |

|       |          |   |    |       |       |       |      |      |       |       |       |       |      |      |      |      |
|-------|----------|---|----|-------|-------|-------|------|------|-------|-------|-------|-------|------|------|------|------|
| L17_L | L17_L_1C | C | 4  | 99.2  | 82.4  | 117.0 | 5.5  | 8.1  | 634.9 | 652.6 | 644.3 | 650.6 | 9.2  | 6.7  | 13.5 | 1.9  |
|       | L17_L_3C | C | 4  | 217.9 | 189.1 | 222.8 | 6.0  | 8.7  | 634.9 | 652.6 | 644.3 | 650.6 | 2.0  | 3.4  | 0.8  | 21.4 |
|       | L17_L_1C | C | 10 | 133.5 | 125.2 | 143.6 | 8.0  | 11.3 | 634.9 | 652.6 | 644.3 | 650.6 | 10.6 | 16.8 | 6.2  | 8.5  |
|       | L17_L_-C | C | 13 | 92.3  | 61.8  | 104.3 | 5.0  | 7.3  | 634.9 | 652.6 | 644.3 | 650.6 | 2.9  | 19.7 | 4.6  | 12.3 |
| P_W   | P_W_134C | C | 3  | 59.5  | 49.0  | 63.3  | 9.4  | 12.7 | 8.9   | 9.0   | 10.4  | 10.1  | 0.3  | 0.0  | 0.0  | 0.2  |
|       | P_W_-C   | C | 16 | 7.7   | 0.0   | 13.8  | 5.6  | 8.0  | 8.9   | 9.0   | 10.4  | 10.1  | 0.1  | 0.1  | 0.2  | 0.2  |
| P_T   | P_T_-C   | C | 3  | 49.4  | 42.0  | 68.7  | 7.3  | 9.9  | 4.6   | 4.6   | 4.8   | 4.5   | 0.1  | 0.0  | 0.1  | 0.1  |
| Lt_n  | Lt_n_-C  | C | 2  | 16.1  | 0.0   | 35.3  | 6.4  | 9.1  | 171.1 | 175.3 | 171.6 | 170.5 | 0.1  | 0.4  | 4.2  | 0.6  |
|       | Lt_n_4C  | C | 4  | 160.4 | 59.5  | 205.7 | 4.8  | 7.1  | 171.1 | 175.3 | 171.6 | 170.5 | 0.6  | 2.9  | 1.7  | 0.4  |
|       | Lt_n_1C  | C | 4  | 230.5 | 226.3 | 233.4 | 10.8 | 14.5 | 171.1 | 175.3 | 171.6 | 170.5 | 3.1  | 1.9  | 1.9  | 2.6  |
|       | Lt_n_-C  | C | 14 | 116.5 | 103.6 | 116.5 | 4.8  | 7.0  | 171.7 | 175.6 | 171.8 | 170.4 | 0.1  | 0.1  | 2.2  | 0.9  |
| Lt_L  | Lt_L_3C  | C | 10 | 74.6  | 33.0  | 90.7  | 5.0  | 7.1  | 104.6 | 93.6  | 113.1 | 99.7  | 4.0  | 1.4  | 1.0  | 0.3  |
| Lt_W  | Lt_W_2C  | C | 8  | 149.9 | 52.7  | 189.0 | 4.5  | 6.4  | 6.4   | 7.2   | 5.8   | 6.3   | 0.1  | 0.3  | 0.1  | 0.1  |

Note: <sup>f</sup>: QTL\_-C: QTL detected by the across-family analysis on the multiple cross design C. QTL\_iC: QTL also detected by the within-family analysis on the single cross i with cross 1 = LM2T x DA10D; 2 = LM2T x LM269D; 3 = LM718T x DA10D; 4 = LM718T x LM269D. <sup>g</sup>: From the first marker of the group. <sup>h</sup>: Significant F threshold of 4.5 (equivalent LOD of 3.9). <sup>i</sup>: Compared to the global mean of the multiple cross design. with 1 = LM2T x DA10D; 2 = LM2T x LM269D; 3 = LM718T x DA10D; 4 = LM718T x LM269D. <sup>j</sup>: as <sup>e</sup>: additive substitution allelic effect (two allele of opposite effects by model).
